# Supplementary material for: ZBTB7A suppresses glioblastoma tumorigenesis through the transcriptional repression of EPB41L5
Source: Research Square preprint supplement (doi:10.21203/rs.3.rs-1977491/v1), 2022-09-06
Supplement: Supplementary file 1 [file de977538e84314d694a2f53c.docx]

**Supplementary Figure 1**

**a**

**
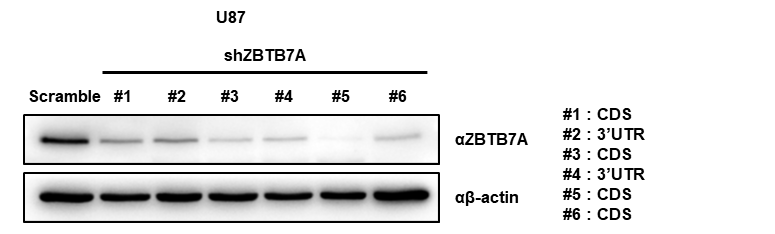
**

**b**

**
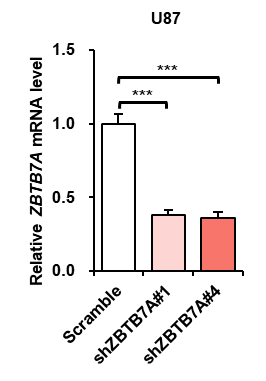
**

**Supplementary Figure 2**

**a**

**
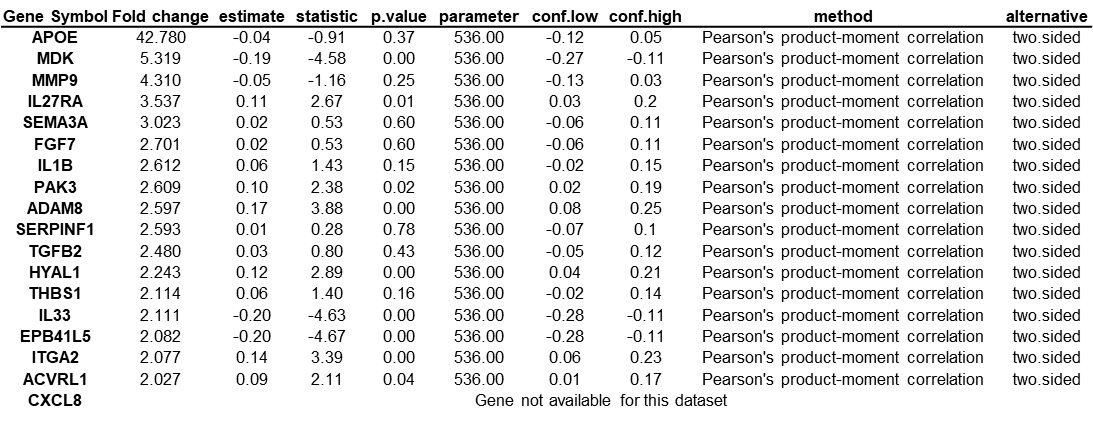
**

**b**


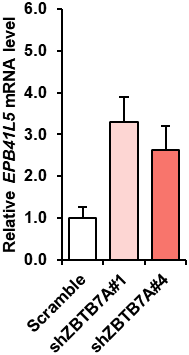


**U87**

******

*****

**c**


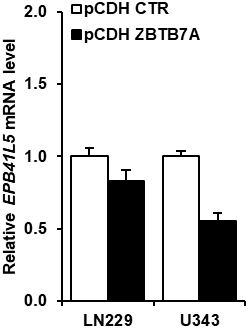


*****

*******

**Supplementary Figure 3**

**a**

**b**

**U343**

**pCDH CTR**

**pCDH ZBTB7A**


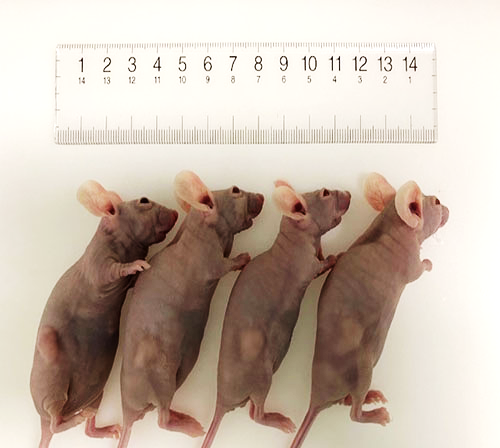

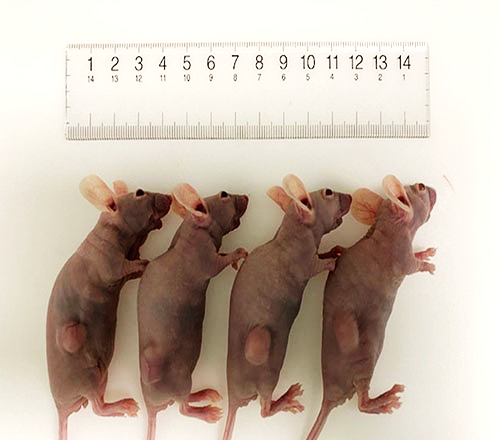


**(cm)**

**(cm)**


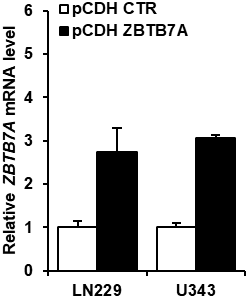


*****

*******


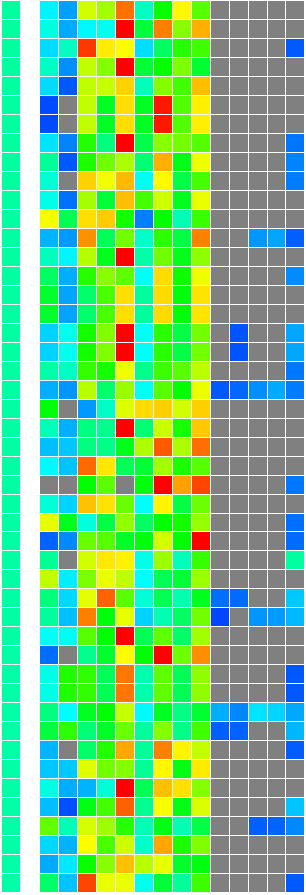


***PTBP2***

***RPL3***

***ATXN1L***

***NAPB***

***THUMPD3***

***ZBTB17***

***SHFL***

***ZNF140***

***EPB41L5***

***KANSL1***

***GSS***

***MYH7B***

***RPL37***

***CCDC150***

***GAA***

***AP3S1***

***RAB11FIP2***

***MXD3***

***PYROXD1***

***SUN1***

***RUVBL1***

***GSK3B***

***PRR5***

***ARHGEF2***

***MELTF***

***ZNF385A***

***ANKRD36***

***SUPT3H***

***SCN11A***

***WDR48***

***DNAAF1***

***HSDL1***

***NTPCR***

***TMEM219***

***ALAD***

***CNN2***

***TSNAX***

***MRAP2***

***NUP54***

***RAB9A***

***GLB1***

***TMPPE***

***AXL***

***CDC42BPA***

***MLLT10***

***CHMP1B***

***SLC39A13***

**ZBTB7A's**

**Target genes**

**ZBTB7A: Average**

**SRX190208: ECC-1**

**SRX190287: Hep G2**

**SRX100518: K-562**

**SRX3161009: HUDEP-2**

**SRX3161011: HUDEP-2**

**SRX3161001: K-562**

**SRX3161002: K-562**

**SRX3161003: K-562**

**SRX3161004: K-562**

**SRX5076290: VCaP**

**SRX5076291: VCaP**

**SRX5076292: VCaP**

**SRX5076293: VCaP**

**SRX5076294: VCaP**

**(Values = Binding scores of MACS2)**

**d**

**c**

**pCDH CTR**

**pCDH ZBTB7A**

*****

**U343**

**Supplementary Figure 4**

**a**

**Library : Transcription Factor Motifs (JASPAR CORE 2018 vertebrates) Motif : ZBTB7A**

**From : -1000 To : 100 bp relative to TSS and a cut-off (*p*-value) of : 0.001**


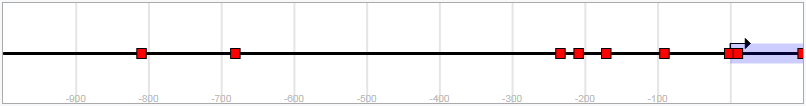


**ZBTB7A [*p*-value = 0.001] : -816, -687, -240, -215, -177, -97, -8, -4, 93**

**#1**

**#2**

**#3**

**#4**


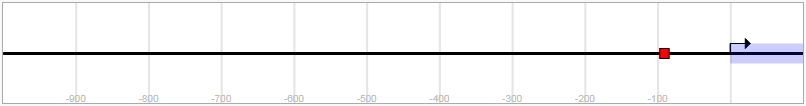


**Library : Transcription Factor Motifs (JASPAR CORE 2018 vertebrates) Motif : ZBTB7A**

**From : -1000 To : 100 bp relative to TSS and a cut-off (*p*-value) of : 0.0001**

**ZBTB7A [*p*-value = 0.0001] : -97**

**#3**

**b**

**>FP003890 EPB41L5_1 :+U EU:NC; range -900 to 100.**

**TGGGATTACAGGAGTGAGCCACCGCGCCCAGCCAAATGCCACCTTCTTAT**

**TGTGACCTGCTATGTAAAATCGCAAACCCTCACTGCCTGTGGTTATTCCC**

**TACTTGTACTTTTCTTTTTAGCATTTACCAATGTCTGACAGTATTTAATT**

**TCACTAATTTATCTCGTTTATTTTATGTCTCGTTTATATTCCTGCTATAA**

**CGTAAACTCCGGGAAGGATTTTTGTCTGTCTTGGTTGTCTGTCGTATCTC**

**GTGTCTAGAACACAGAACTCACAGTAAGTAGGCACTTCAATCAATTACCT**

**GTAGAATGAACGGACTGAATGTCACCTTGTTAGAGTACCCTCCTGACCAC**

**ACTCTGCTAAGCAGTAATCTTTTATTTCTCTTTCCCAGTTTTATTTTTCC**

**TCATTTACACTTAATCACCTTGTGACACCTATTTGTTTACTGTTTCCCCA**

**GTAGAGTGAAAGTCACTTTAACAGCAGAGATTTAAATGTATTTTAATCCC**

**TACAAAGGAGAAAAAGGGAGGAAATACGTGACAGGCTCTCAATAAGTATT**

**TGCGAAGGATTTAATCTCTTGAACGAATGGATGAATGAATCTAGCAGCCA**

**GCTCCACCAGCCTCCTTCGTGATAGGACTAACTGGGGTCTGTCTGCGGAC**

**GGGCGCCTCCTCCGCGGGCGGAGGGCCGCAGCGGGAACTGGGTTTCGGCA**

**GCGCCCCTTTAAACCAGCCGCGGACGCCCGGCTGCTGGCGCTAGTTCCAG**

**CCCGGCCGGGCCCGGCCTCGCCGGTTTCTCTCCAGTCGCCGCGCCGGCCA**

**ATTTCCGGGGCGGTGTCATCGCCCGTTTAAGAGCGGAGCGCTCCGCCCTG**

**GGGGCGGAGCTGGGAGGGAGCTTTAAGGGGTGGACGGGCGGGAGGTCGGG**

**GTCCTCCGGGGATTAGAGCCGGTGGGCTCGTTGTGGGCGCCATTTCTCGG**

**CGTCTACCGAGGAGCCGCCCCTTTCTCAGCCTTGCTCGGCTCTTCCCCGC**

**#1**

**#2**

**#3**

**#4**

**c**

**LN229**

**mt**

**wt**

**-**

**Myc ZBTB7A**

**U343**

**mt**

**wt**

**-**

**αβ-actin**

**αβ-actin**

**αMyc**

**αMyc**

**αZBTB7A**

**αZBTB7A**

**Myc ZBTB7A**

**U87**

**mt**

**wt**

**-**

**Myc ZBTB7A**

**U118**

**mt**

**wt**

**-**

**αβ-actin**

**αβ-actin**

**αMyc**

**αMyc**

**αZBTB7A**

**αZBTB7A**

**Myc ZBTB7A**

**d**

**Scramble**

**shZBTB7A#4**

**U87**

**αβ-actin**

**αEPB41L5**

**αZBTB7A**

**Supplementary Figure Legends**

**Supplementary Figure 1.** Expression of ZBTB7A knockdown U87 cells. **a, b** Western blot and qPCR analysis of ZBTB7A silencing in U87 cells. ****p* < 0.001.

**Supplementary Figure 2. Reverse correlation targets with ZBTB7A in patient samples. a** Correlation of 18 overlapping genes with ZBTB7A in the TCGA-GBM dataset (GlioVis). **b, c** *EPB41L5* mRNA level in shZBTB7A U87 cells and pCDH ZBTB7A LN229, U343 cells. **p* < 0.05, ***p* < 0.01, ****p* < 0.001

**Supplementary Figure 3. Reduction of subcutaneous tumor by ZBTB7A overexpression. a** mRNA level of *ZBTB7A* in pCDH ZBTB7A LN229, U343 cells. **b** Tumor size confirmed 5 weeks after subcutaneous injection of pCDH ZBTB7A U343 cells (n = 4 mice/group). **c** The survival rate of a mouse model injected subcutaneously with pCDH ZBTB7A U343 cells. **d** Target gene and MACS2 binding score of potential ZBTB7A at ± 1 kb distance using ChIP-Atlas. **p* < 0.05, ****p* < 0.001

**Supplementary Figure 4. Schematic diagram of the binding site of ZBTB7A in the *EPB41L5* promoter region. a** Predicted binding site to which the ZBTB7A motif can bind in the *EPB41L5* promoter region (-900 to 100) (EPD). **b** *EPB41L5* promoter sequence from -900 to 100 region (EPD). **c** Protein levels of Myc ZBTB7A wt and mt in LN229, U343, U118 and U87 cells. **d** Western blot analysis of shZBTB7A#4 U87 cells.

**Table 1. List of primer for shRNA, qPCR, ChIP**

| **shRNA** | | | |
| --- | --- | --- | --- |
| shZBTB7A#1 | CDS | Sigma-Aldrich | TRCN0000137332 |
| shZBTB7A#2 | 3’UTR | Sigma-Aldrich | TRCN0000136851 |
| shZBTB7A#3 | CDS | Sigma-Aldrich | TRCN0000137998 |
| shZBTB7A#4 | 3’UTR | Sigma-Aldrich | TRCN0000138671 |
| shZBTB7A#5 | CDS | Sigma-Aldrich | TRCN0000138519 |
| shZBTB7A#6 | CDS | Sigma-Aldrich | TRCN0000138716 |

| **qPCR** | |
| --- | --- |
| *ZBTB7A* | F : CATCTGCGAGAAGGTCATCCA  R : AGGTCGTAGTTGTGGGCAAAG |
| *EPB41L5* | F : GAAAGAAGGCCCAGCAAACG  R : AGATCTCATCCCCCAAGCCT |
| *APOE* | F : GTTGCTGGTCACATTCCTGG  R : GCAGGTAATCCCAAAAGCGAC |
| *MDK* | F : CGCGGTCGCCAAAAAGAAAG  R : TACTTGCAGTCGGCTCCAAAC |
| *MMP9* | F : TGTACCGCTATGGTTACACTCG  R : GGCAGGGACAGTTGCTTCT |
| *IL27RA* | F : GACCCTTGGGCGACTTGAA  R : TCTGGAGGTGTAACTCGGAGG |
| *SEMA3A* | F : GTGCCAAGGCTGAAATTATCCT  R : CCCACTTGCATTCATCTCTTCT |
| *FGF7* | F : TCCTGCCAACTTTGCTCTACA  R : CAGGGCTGGAACAGTTCACAT |
| *IL1B* | F : ATGATGGCTTATTACAGTGGCAA  R : GTCGGAGATTCGTAGCTGGA |
| *PAK3* | F : CCAGGCTTCGCTCTATCTTCC  R : TCAAACCCCACATGAATCGTATG |
| *ADAM18* | F : GTCACAGTTCCACGGAAGATT  R : CAGCATATCCTTGGTAATGGCA |
| *SERPINF1* | F : TTCAAAGTCCCCGTGAACAAG  R : GAGAGCCCGGTGAATGATGG |
| *TGFB2* | F : CAGCACACTCGATATGGACCA  R : CCTCGGGCTCAGGATAGTCT |
| *HYAL1* | F : CGATATGGCCCAAGGCTTTAG  R : ACCACATCGAAGACACTGACAT |
| *THBS1* | F : AGACTCCGCATCGCAAAGG  R : TCACCACGTTGTTGTCAAGGG |
| *IL33* | F : GTGACGGTGTTGATGGTAAGAT  R : AGCTCCACAGAGTGTTCCTTG |
| *ITGA2* | F : CCTACAATGTTGGTCTCCCAGA  R : AGTAACCAGTTGCCTTTTGGATT |
| *ACVRL1* | F : CGAGGGATGAACAGTCCTGG  R : GTCATGTCTGAGGCGATGAAG |
| *CXCL8* | F : TTTTGCCAAGGAGTGCTAAAGA  R : AACCCTCTGCACCCAGTTTTC |
| *CDH2* | F : CCATCACTCGGCTTAATGGT  R : GATGATGATGCAGAGCAGGA |
| *CTNNB1* | F : AGCTTCCAGACACGCTATCAT  R : CGGTACAACGAGCTGTTTCTAC |
| *VIM* | F : CCCTCACCTGTGAAGTGGAT  R : TCCAGCAGCTTCCTGTAGGT |

| **ChIP** | |
| --- | --- |
| -833/-649 | F : AATCGCAAACCCTCACTGCC  R : ACGAGATACGACAGACAACCA |
| -314/-177 | F : GAATCTAGCAGCCAGCTCCA  R : TCCGCGGCTGGTTTAAAGG |
| -202/-58 | F : CAGCGCCCCTTTAAACCAG  R : GAGCGCTCCGCTCTTAAAC |
| -130/-56 | F : CCGGTTTCTCTCCAGTCGC  R : TAGACGCCGAGAAATGGCG |
